# Supplementary material
Source: MDPI journal article supplement (https://www.mdpi.com/2073-4344/11/1/16)
Supplement: s1 [file s1]

# Highly Regioselective and Stereoselective Biohydroxylations of Oxandrolone

Paulina Łyczko\*, Anna Panek and Alina Świzdor\*

Department of Chemistry, Wrocław University of Environmental and Life Sciences, 50-375 Wrocław, Poland; anna.panek@upwr.edu.pl

\* Correspondence: paulina.lyczko@upwr.edu.pl (P.Ł.); alina.swizdor@upwr.edu.pl (A.Ś.)

**Contents:**

|                                                                                  |    |
|----------------------------------------------------------------------------------|----|
| Figure S1. MS spectrum of 12 $\beta$ -hydroxyoxandrolone (2).                    | 2  |
| Figure S2. <sup>1</sup> H NMR spectrum of 12 $\beta$ -hydroxyoxandrolone (2).    | 2  |
| Figure S3. <sup>13</sup> C NMR spectrum of 12 $\beta$ -hydroxyoxandrolone (2).   | 3  |
| Figure S4. NOESY spectrum of 12 $\beta$ -hydroxyoxandrolone (2).                 | 3  |
| Figure S5. MS spectrum of 9 $\alpha$ -hydroxyoxandrolone (3).                    | 5  |
| Figure S6. <sup>1</sup> H NMR spectrum of 9 $\alpha$ -hydroxyoxandrolone (3).    | 4  |
| Figure S7. <sup>13</sup> C NMR spectrum of 9 $\alpha$ -hydroxyoxandrolone (3).   | 6  |
| Figure S8. MS spectrum of 6 $\alpha$ -hydroxyoxandrolone (4).                    | 6  |
| Figure S9. <sup>1</sup> H NMR spectrum of 6 $\alpha$ -hydroxyoxandrolone (4).    | 7  |
| Figure S10. <sup>13</sup> C NMR spectrum of 6 $\alpha$ -hydroxyoxandrolone (4).  | 7  |
| Figure S11. NOESY spectrum of 6 $\alpha$ -hydroxyoxandrolone (4).                | 8  |
| Figure S12. MS spectrum of 15 $\alpha$ -hydroxyoxandrolone (5).                  | 8  |
| Figure S13. <sup>1</sup> H NMR spectrum of 15 $\alpha$ -hydroxyoxandrolone (5).  | 9  |
| Figure S14. <sup>13</sup> C NMR spectrum of 15 $\alpha$ -hydroxyoxandrolone (5). | 9  |
| Figure S15. DEPT spectrum of 15 $\alpha$ -hydroxyoxandrolone (5).                | 10 |
| Figure S16. HSQC spectrum of 15 $\alpha$ -hydroxyoxandrolone (5).                | 10 |
| Figure S17. NOESY spectrum of 15 $\alpha$ -hydroxyoxandrolone (5).               | 10 |

**Citation:** Łyczko, P.; Panek, A.; Świzdor, A. Highly regio- and stereoselective biohydroxylations of oxandrolone. *Catalysts* **2020**, *11*, x. <https://doi.org/10.3390/xxxxx>

Received: 05 December 2020

Accepted: 23 December 2020

Published: date

**Publisher's Note:** MDPI stays neutral with regard to jurisdictional claims in published maps and institutional affiliations.

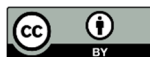

**Copyright:** © 2020 by the author. Figure S submitted for possible open access publication under the terms and conditions of the Creative Commons Attribution (CC BY) license (<http://creativecommons.org/licenses/by/4.0/>).

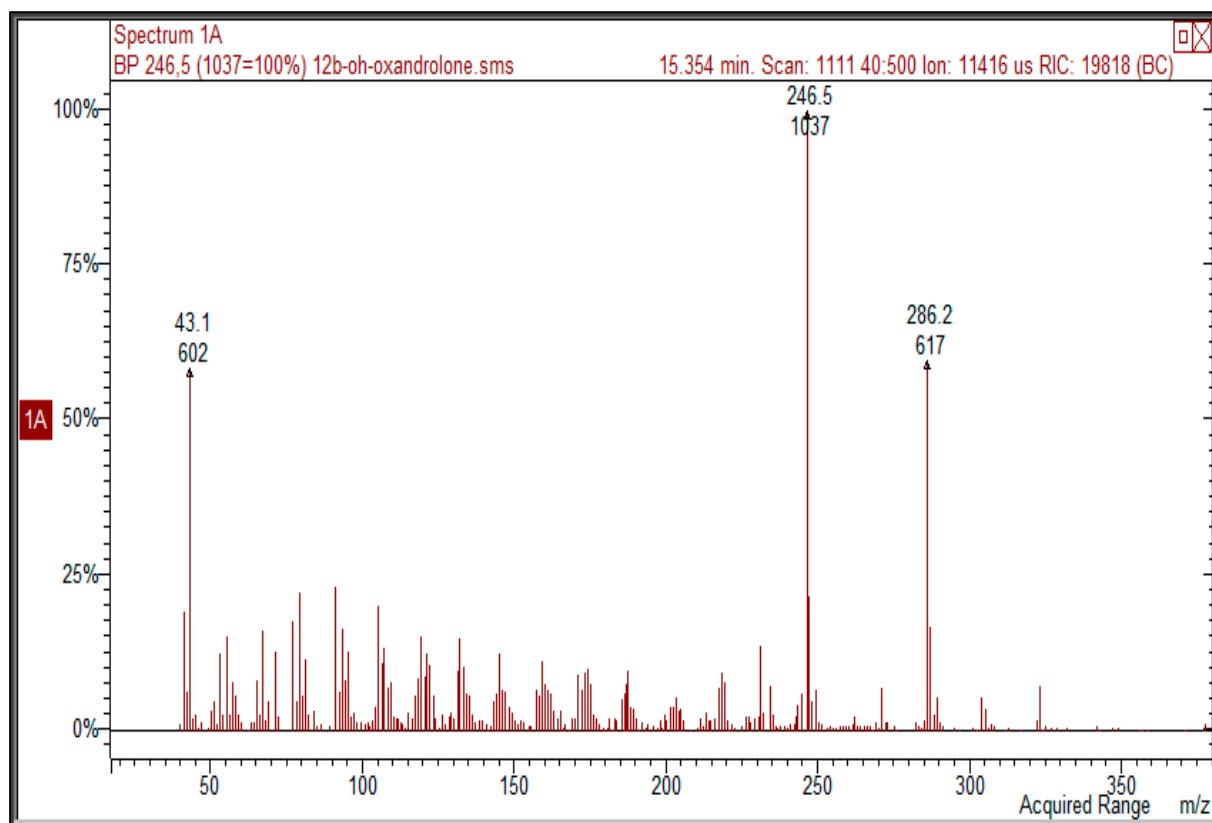Figure S1. MS spectrum of 12 $\beta$ -hydroxyoxandrolone (2).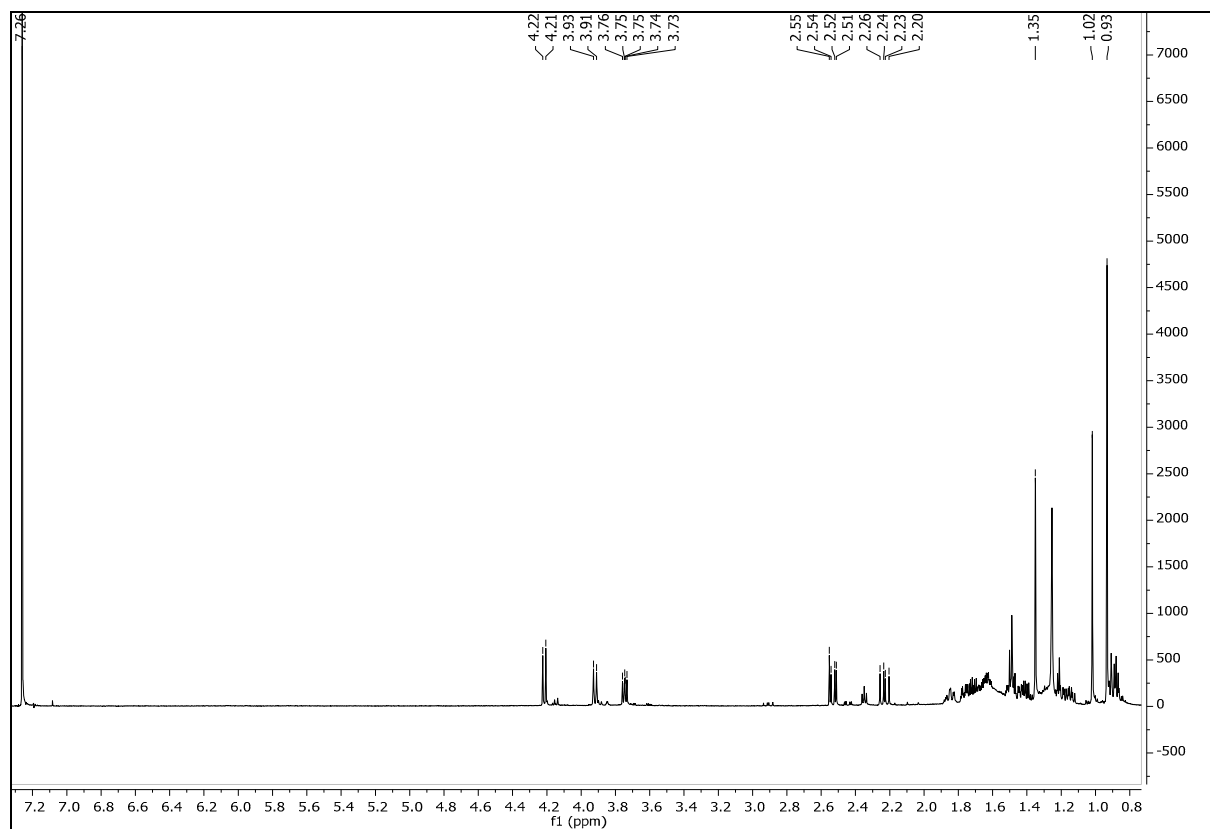Figure S2.  $^1\text{H}$  NMR spectrum of 12 $\beta$ -hydroxyoxandrolone (2).

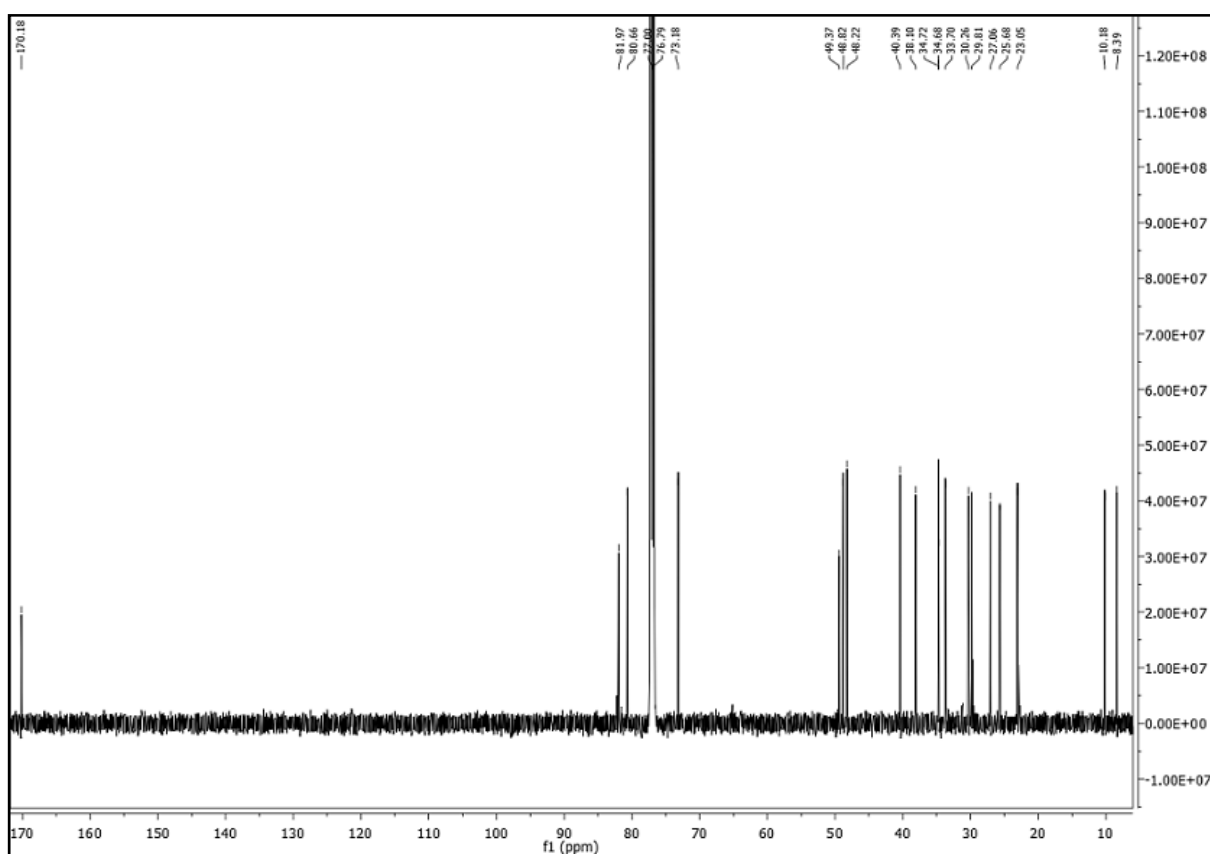Figure S3. <sup>13</sup>C NMR spectrum of 12β-hydroxyoxandrolone (2).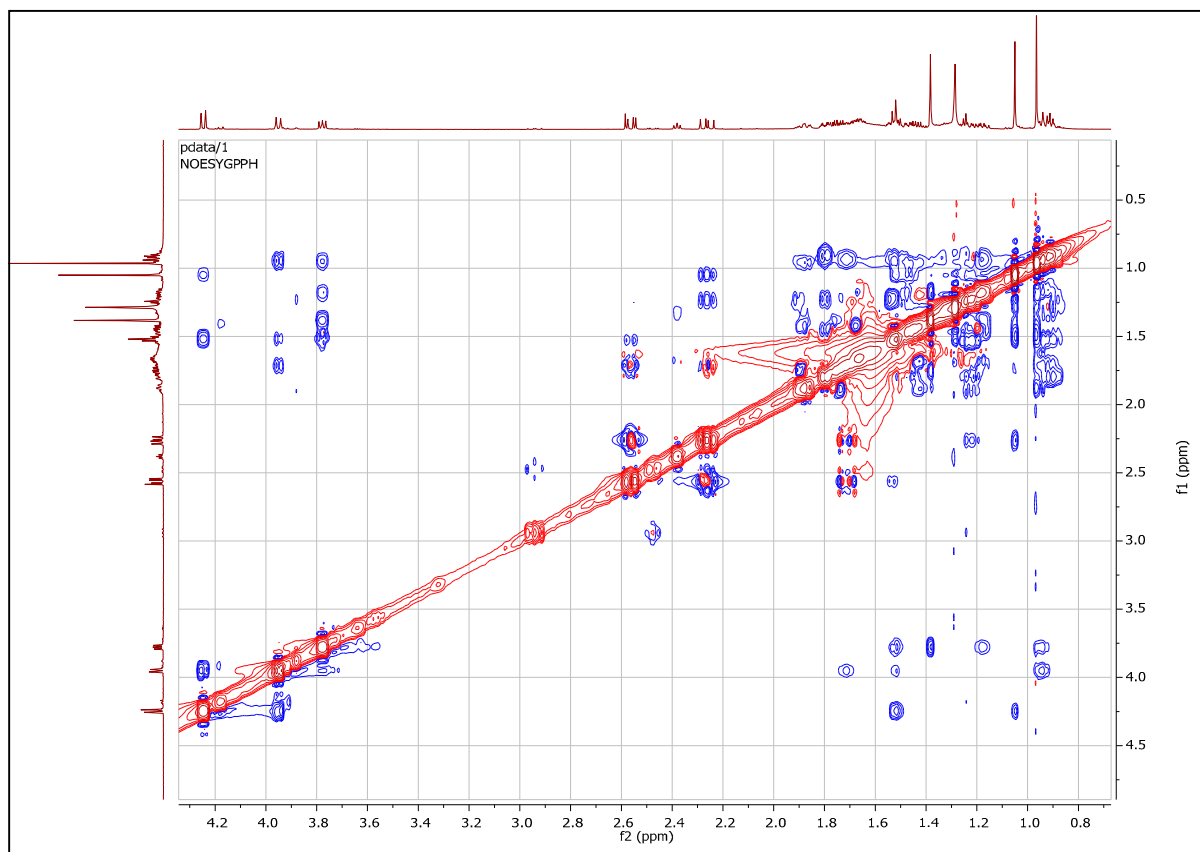

Figure S4. NOESY spectrum of 12β-hydroxyoxandrolone (2).

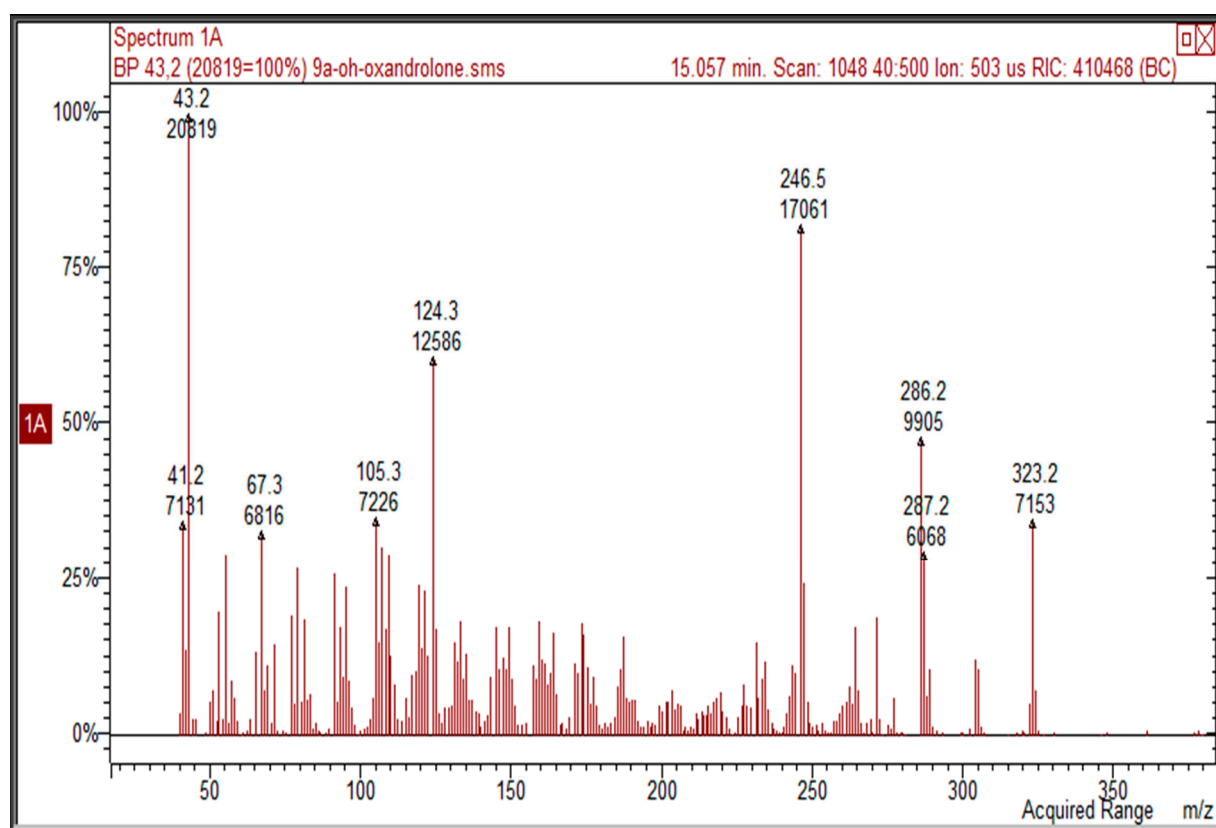Figure S5. MS spectrum of 9 $\alpha$ -hydroxyoxandrolone (3).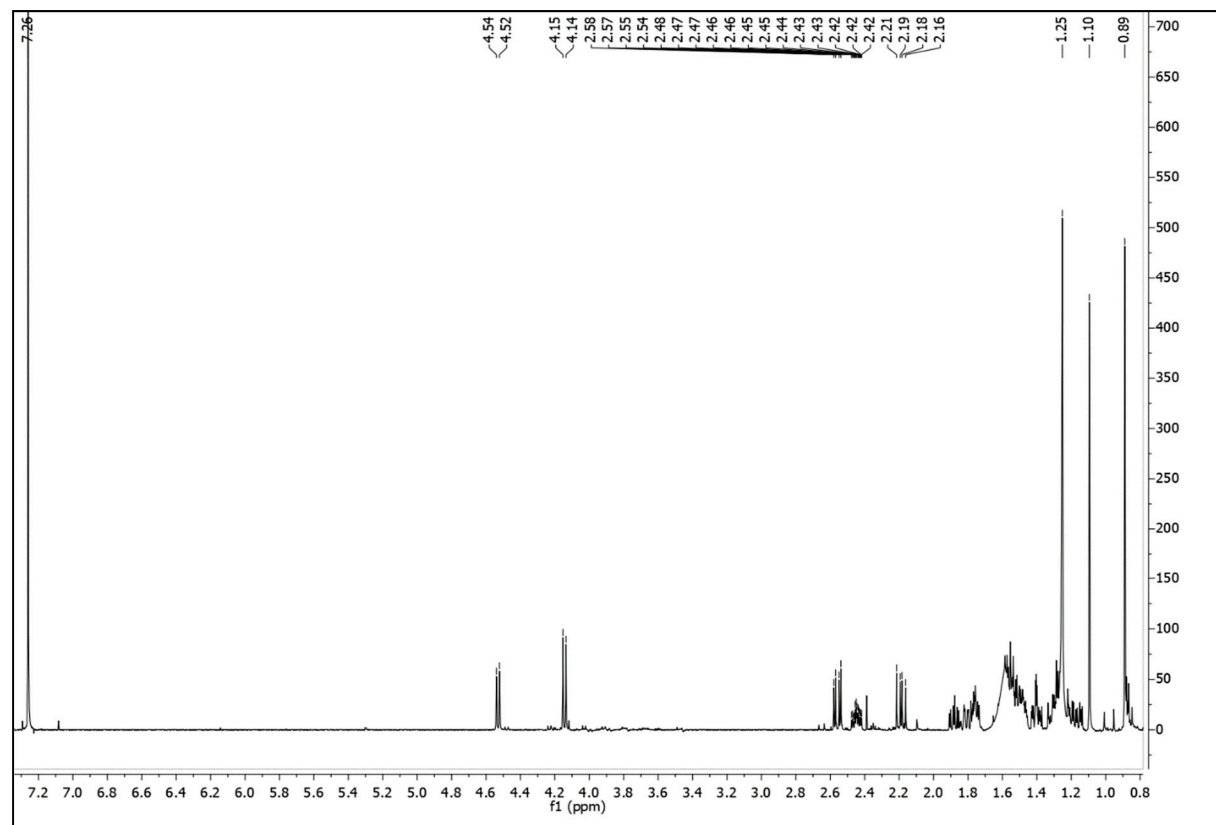Figure S6.  $^1\text{H}$  NMR spectrum of 9 $\alpha$ -hydroxyoxandrolone (3).

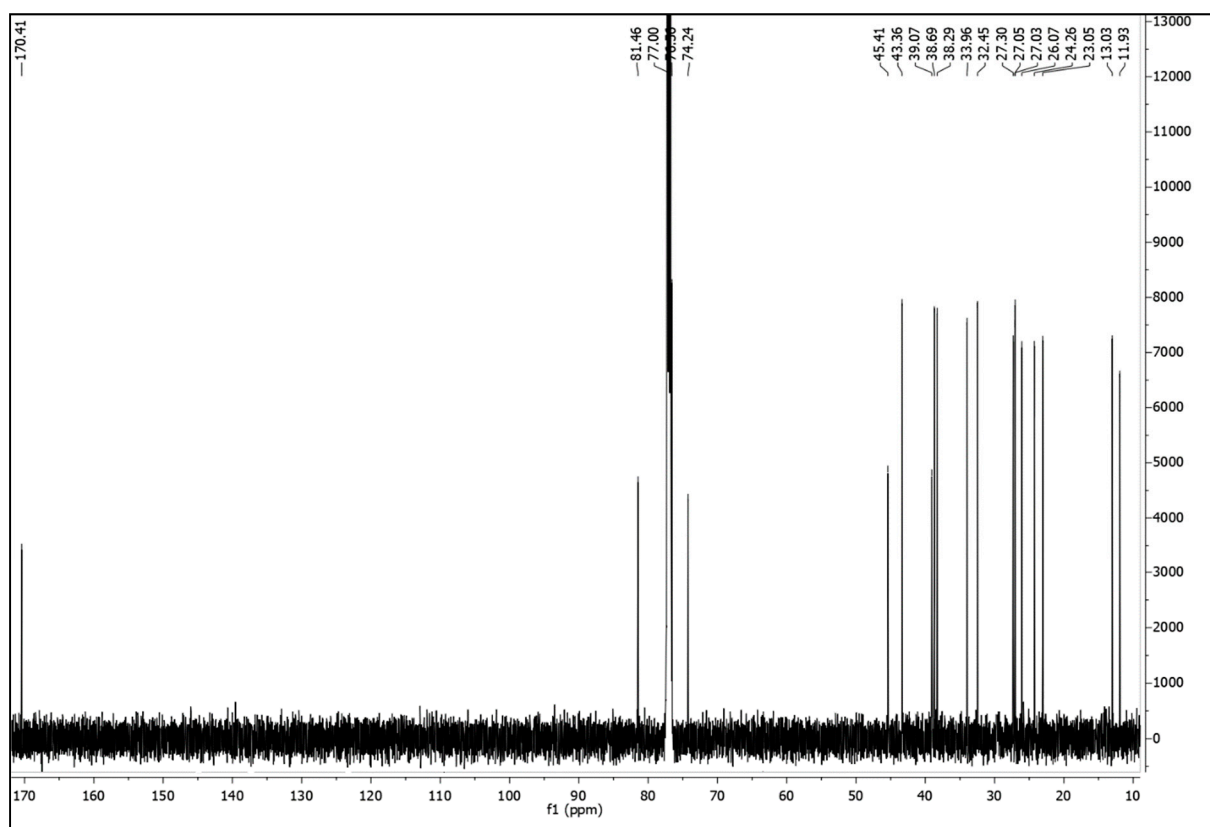Figure S7. <sup>13</sup>C NMR spectrum of 9 $\alpha$ -hydroxyoxandrolone (3).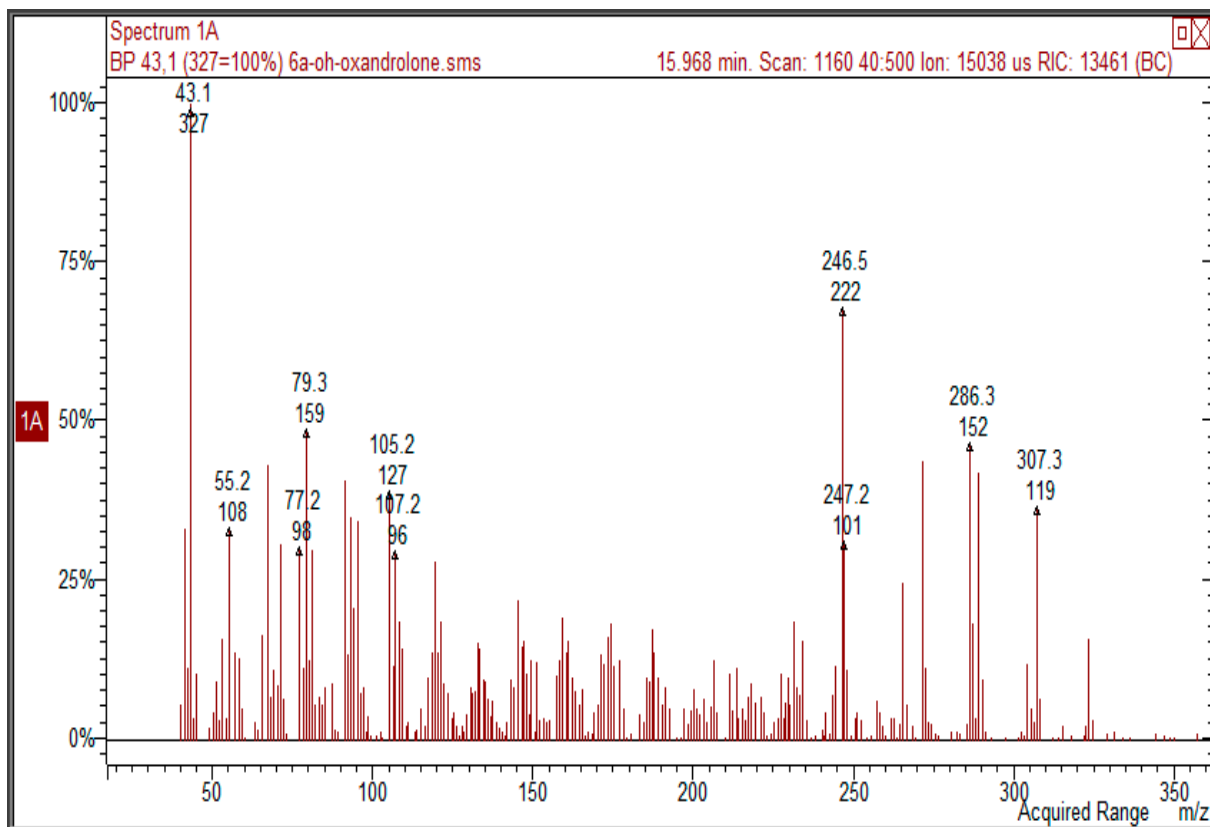Figure S8. MS spectrum of 6 $\alpha$ -hydroxyoxandrolone (4).

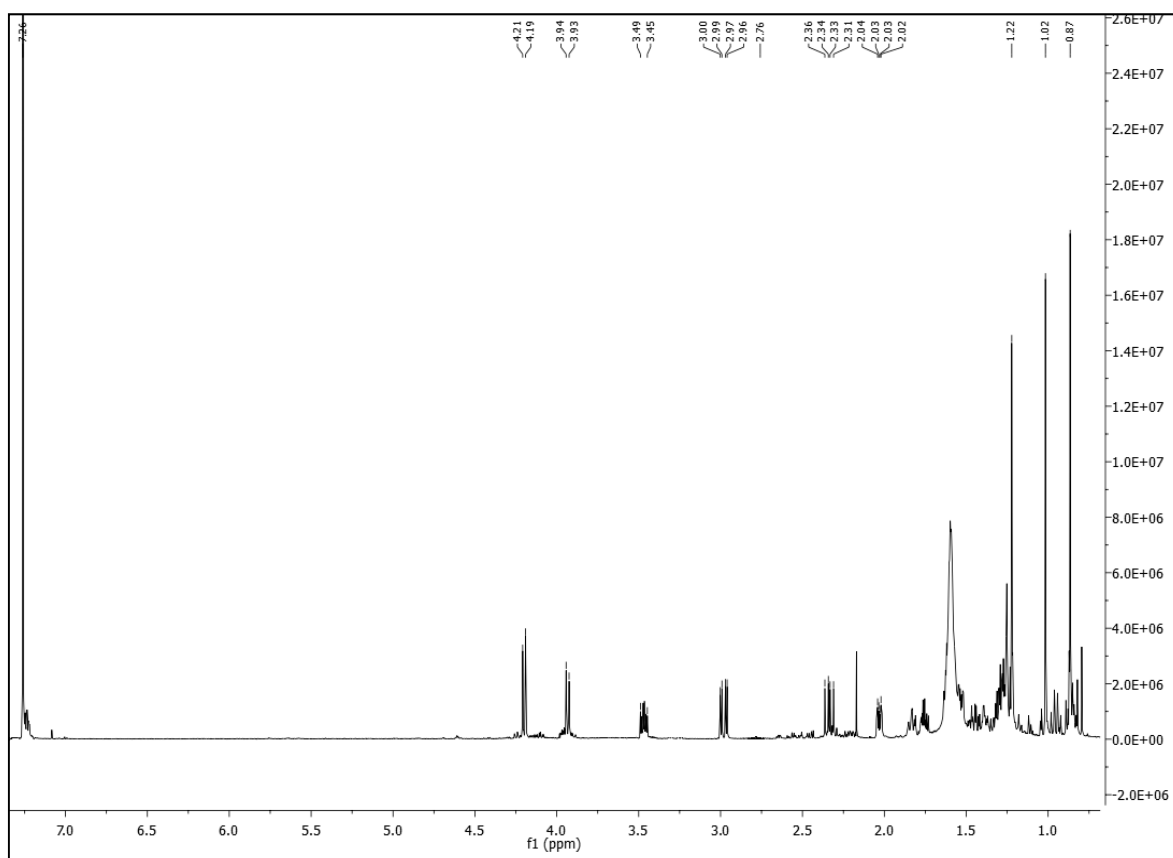Figure S9. <sup>1</sup>H NMR spectrum of 6 $\alpha$ -hydroxyoxandrolone (4).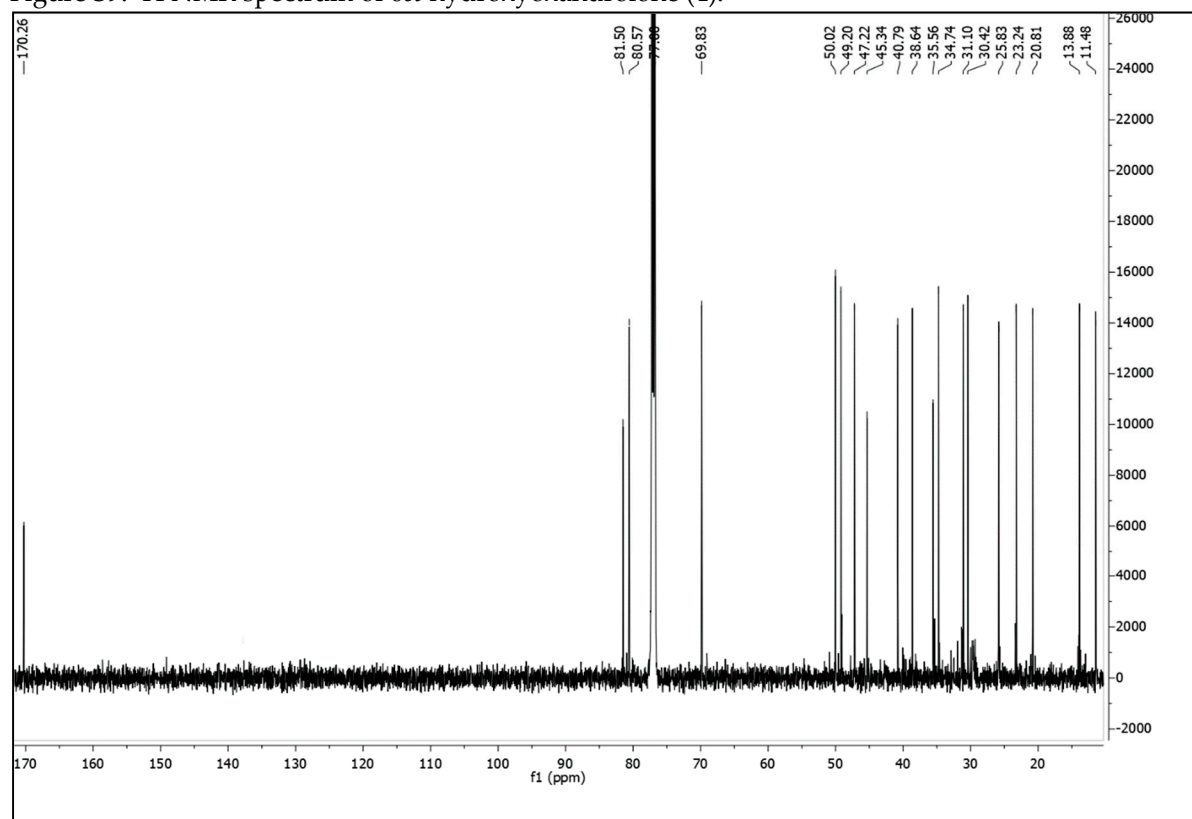Figure S10. <sup>13</sup>C NMR spectrum of 6 $\alpha$ -hydroxyoxandrolone (4).

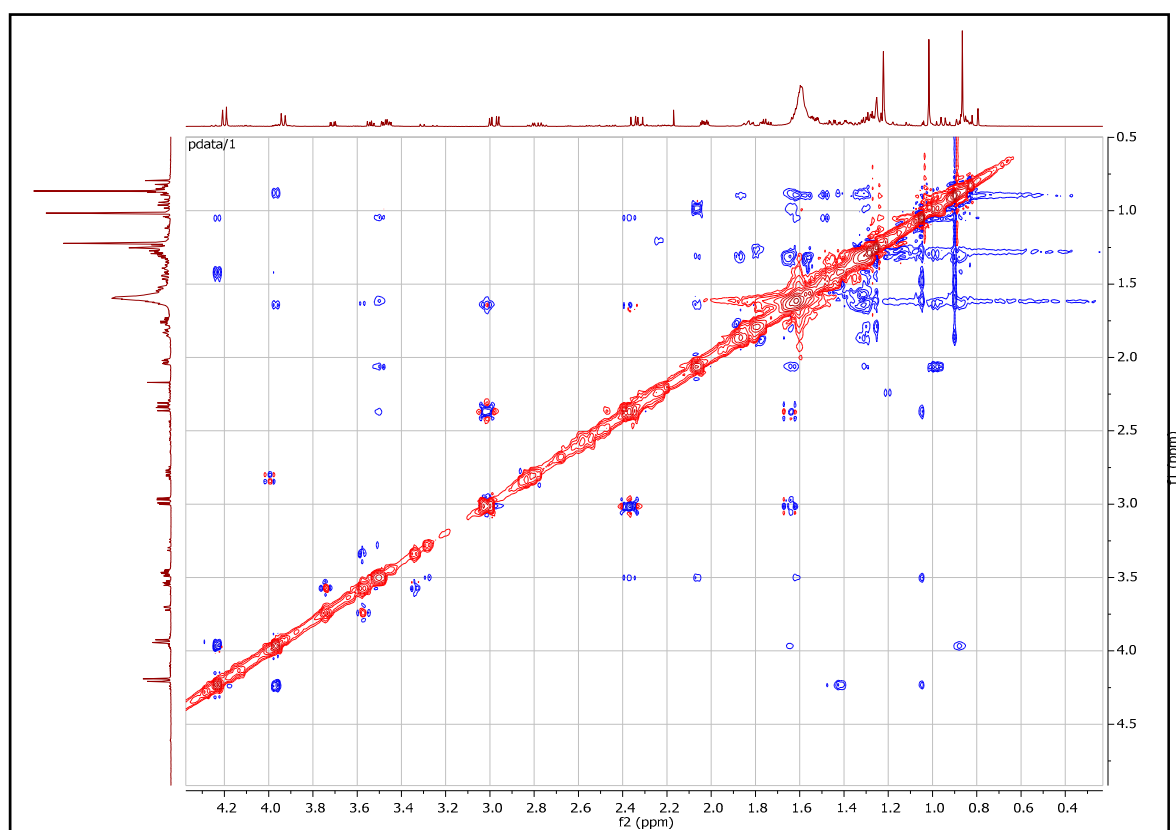Figure S11. NOESY spectrum of 6 $\alpha$ -hydroxyoxandrolone (4).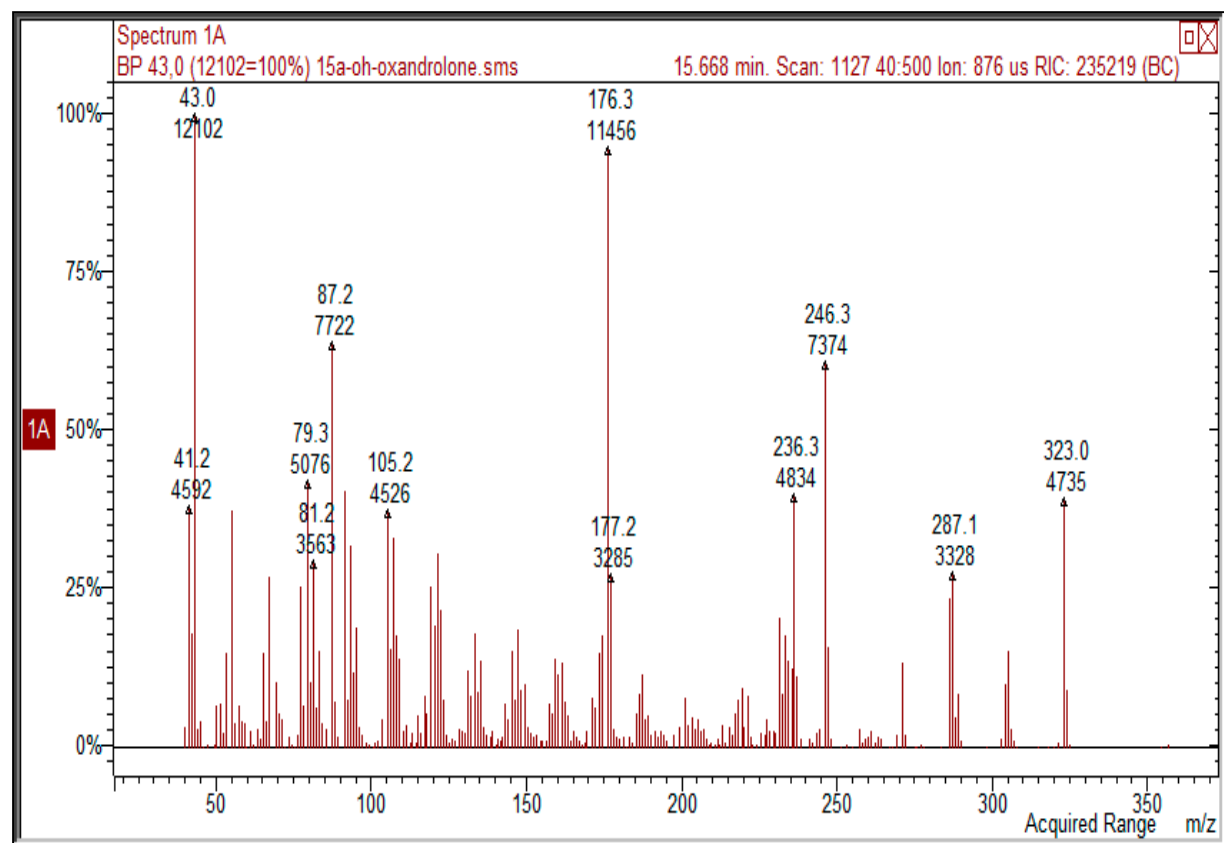Figure S12. MS spectrum of 15 $\alpha$ -hydroxyoxandrolone (5).

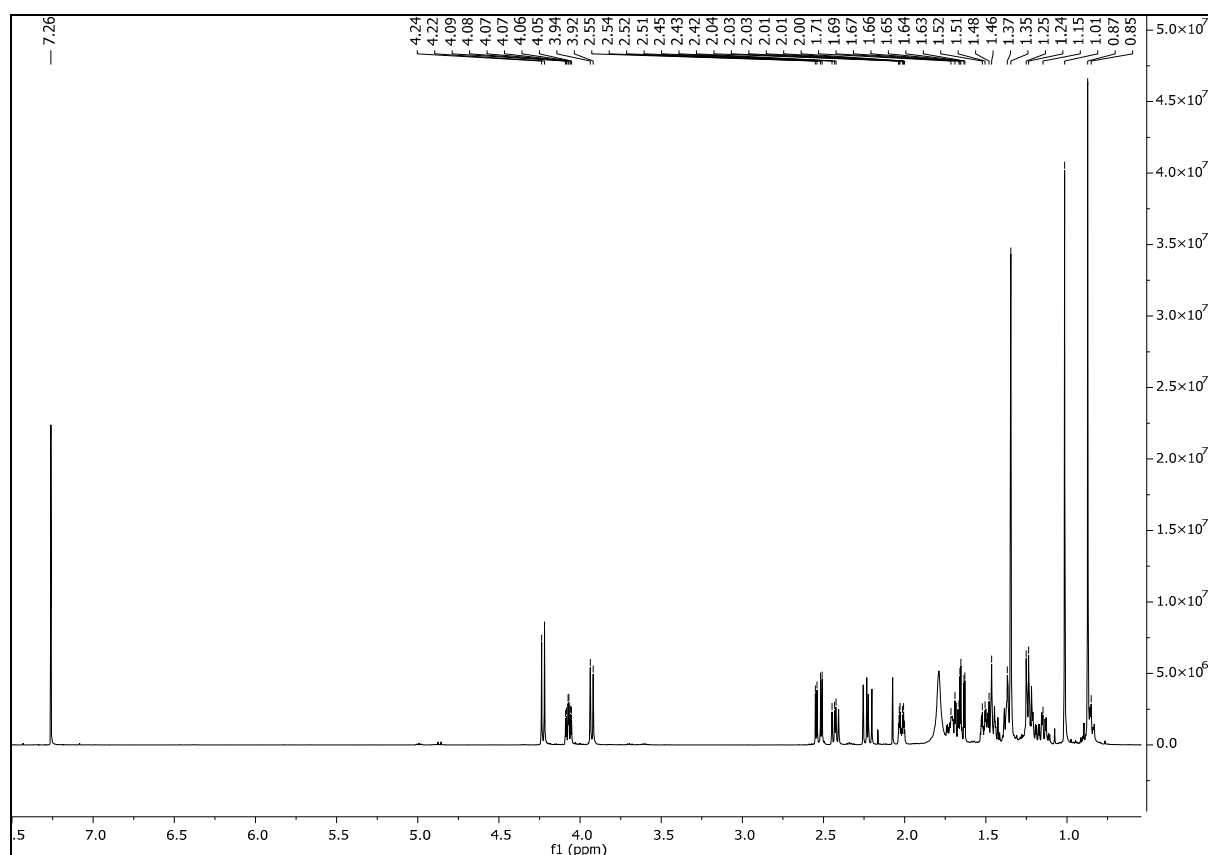Figure S13.  $^1\text{H}$  NMR spectrum of 15 $\alpha$ -hydroxyoxandrolone (5).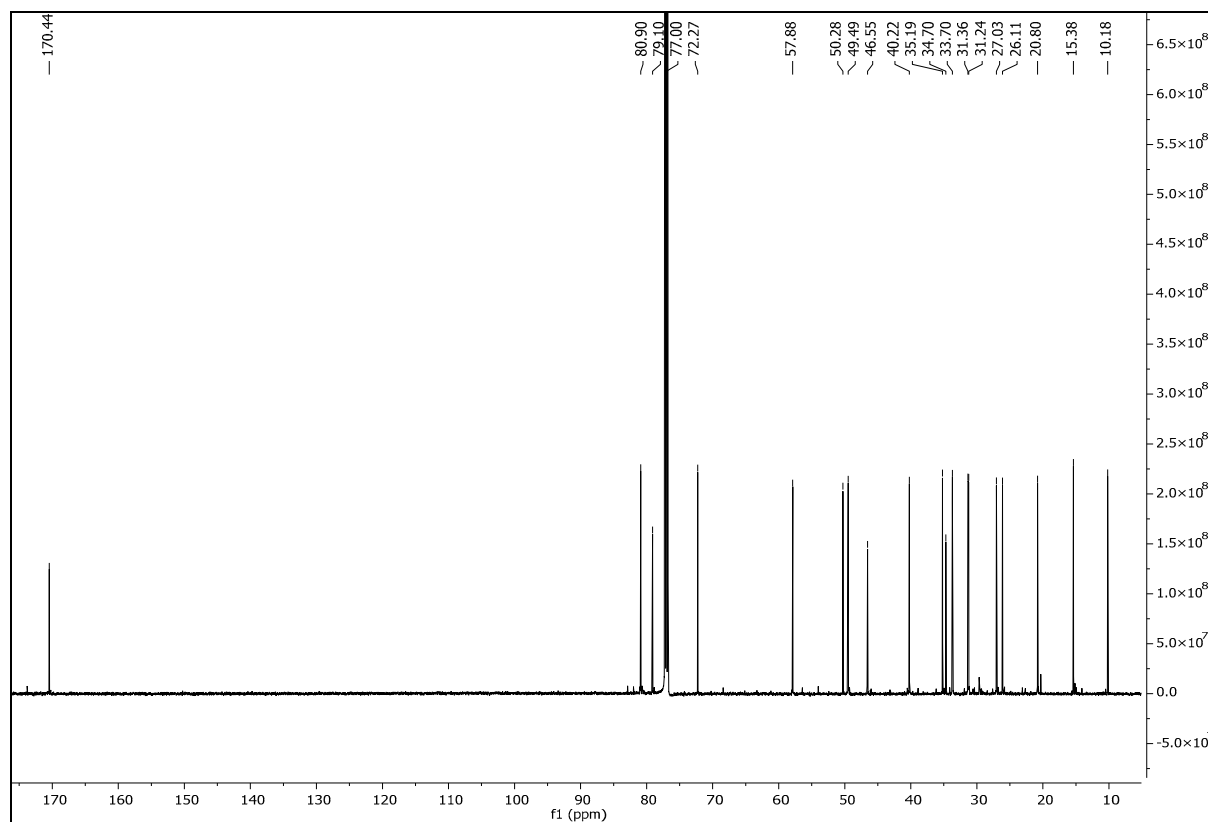Figure S14.  $^{13}\text{C}$  NMR spectrum of 15 $\alpha$ -hydroxyoxandrolone (5).



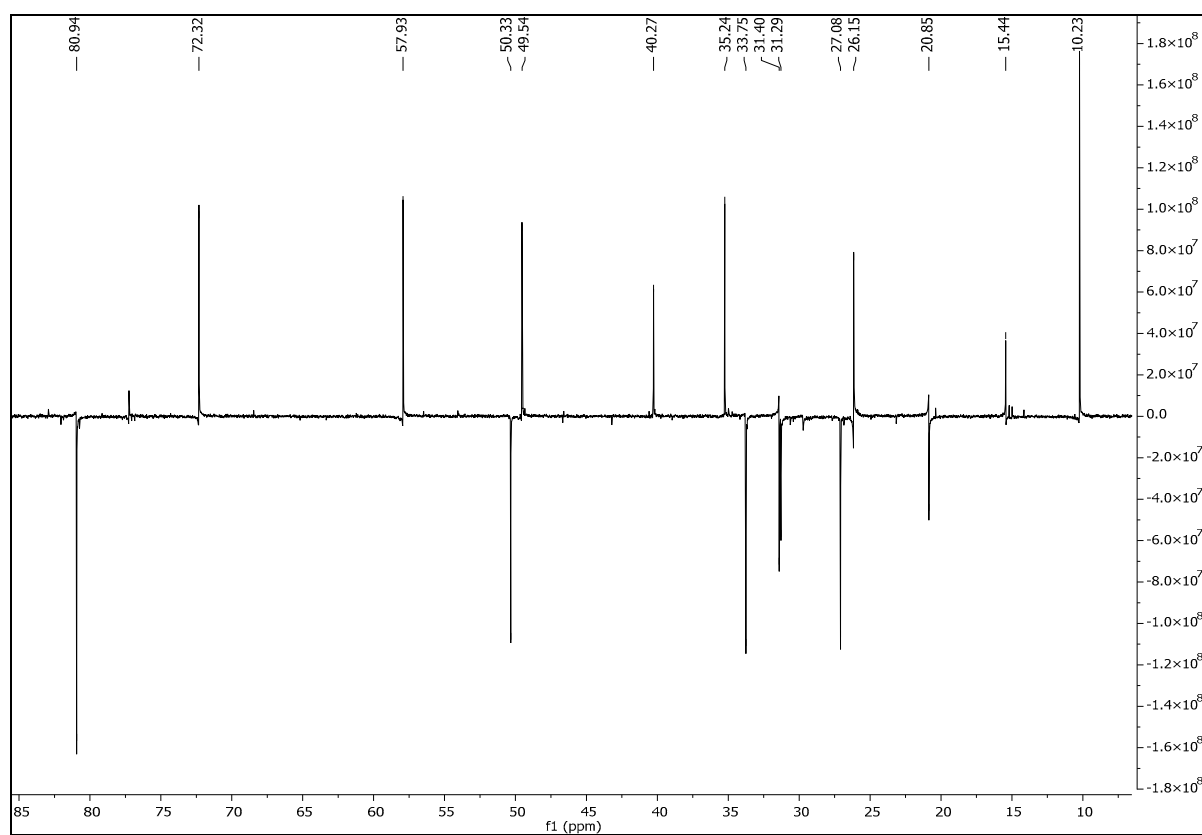Figure S15. DEPT spectrum of 15 $\alpha$ -hydroxyoxandrolone (5).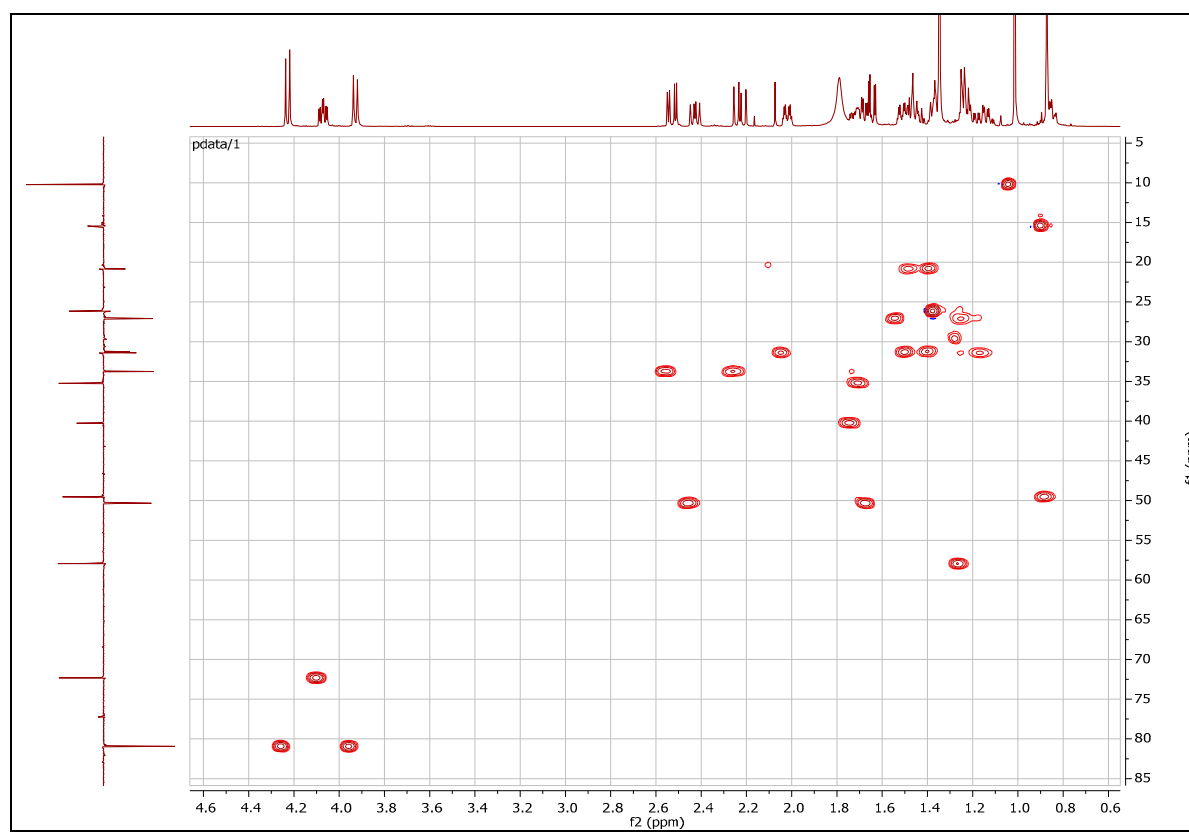Figure S16. HSQC spectrum of 15 $\alpha$ -hydroxyoxandrolone (5).

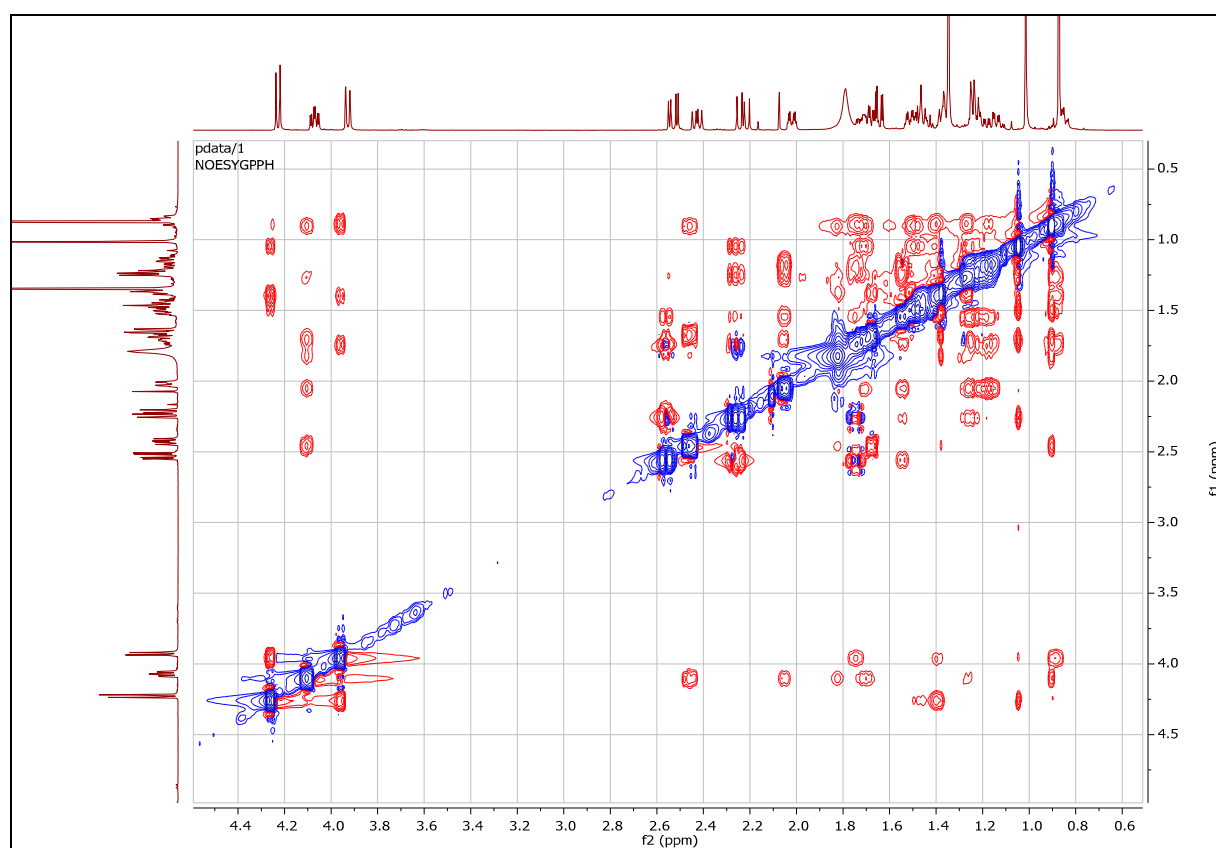

Figure S17. NOESY spectrum of 15 $\alpha$ -hydroxyoxandrolone (5).
